# Supplementary material
Source: publisher figshare collection journal article supplement (https://acs.figshare.com/ndownloader/files/9064033)
Supplement: Supplementary file 1 [file 9064033]

## Supporting Information

### Conjugation dependent interaction of folic acid with folate binding protein

Rachel L. Merzel,<sup>†</sup> Carolina Frey,<sup>†</sup> Junjie Chen,<sup>†</sup> Rachel Garn,<sup>†</sup> Mallory van Dongen,<sup>†</sup> Casey A. Dougherty,<sup>†♦</sup> Ananda Kumar Kandaluru,<sup>§</sup> Philip S. Low,<sup>§</sup> E. Neil G. Marsh,<sup>†‡</sup> and Mark M. Banaszak Holl<sup>†¶♦\*</sup>

<sup>†</sup>Department of Chemistry, <sup>‡</sup>Department of Biological Chemistry, <sup>¶</sup>Department of Biomedical Science and Engineering, <sup>♦</sup>Program in Macromolecular Science and Engineering, University of Michigan, Ann Arbor, Michigan, 48109, United States

<sup>§</sup>Department of Chemistry, Purdue University, West Lafayette, Indiana, 47907, United States

<sup>♦</sup> Current address: Chemistry Department, Iona College, 715 North Avenue, New Rochelle, NY 10801

### Contents

- I. <sup>1</sup>H NMR: G5<sub>Ac</sub>-FA<sub>4(avg)</sub>
- II. Histograms of nanoparticle distributions
- III. AFM Images: PEG-FA + FBP

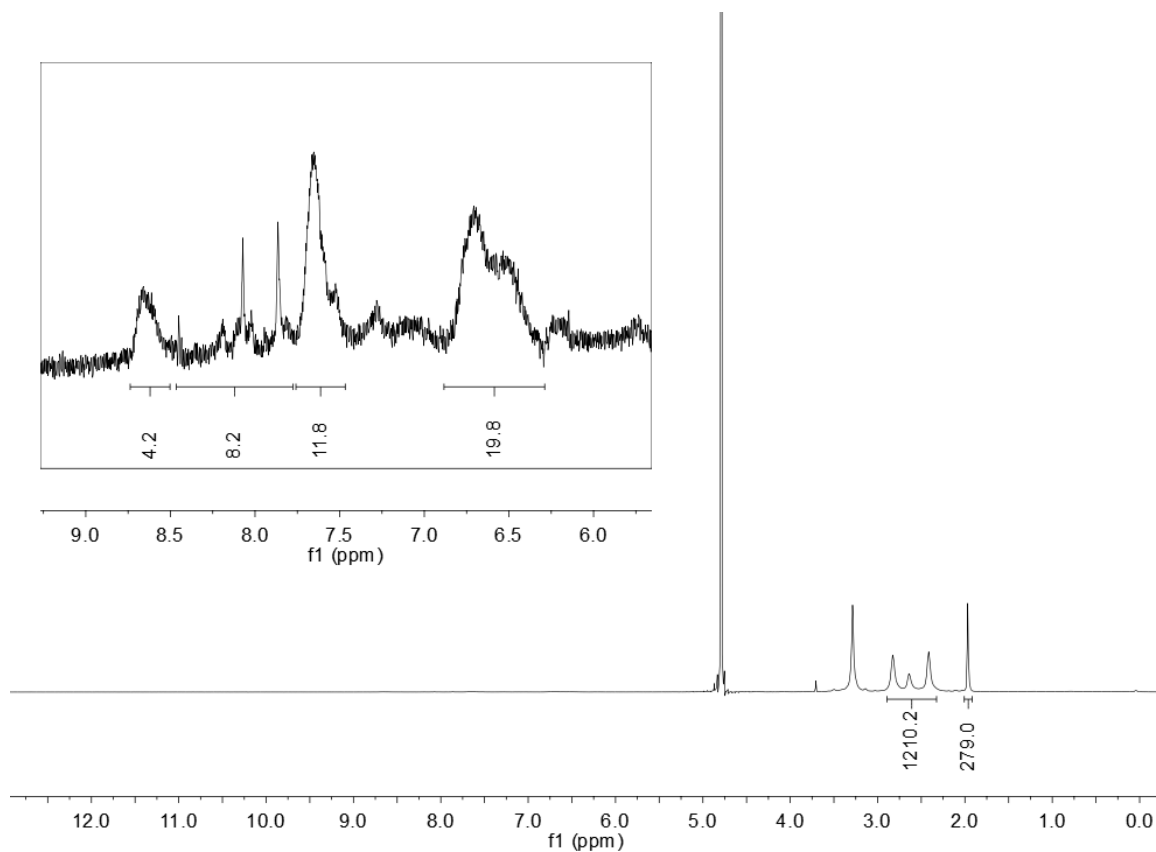

**Figure S1.**  $^1\text{H}$  NMR spectrum ( $\text{D}_2\text{O}$ ) of  $\text{G5}_{\text{Ac}}\text{-FA}_{4(\text{avg})}\text{-FITC}_2$  ( $\text{G5}_{\text{Ac}}\text{-FA}_{4(\text{avg})}$ ). The singlet at 1.97 ppm corresponds to the terminal acetyl groups on the dendrimer. The broad singlet at 8.7 corresponds to 1 FA proton, indicating an average of  $\sim 4$  FA per dendrimer. The broad signal with a max at 6.7 ppm includes 2 FA protons and 5 FITC, leading to an average of  $\sim 2$  FITC per dendrimer.

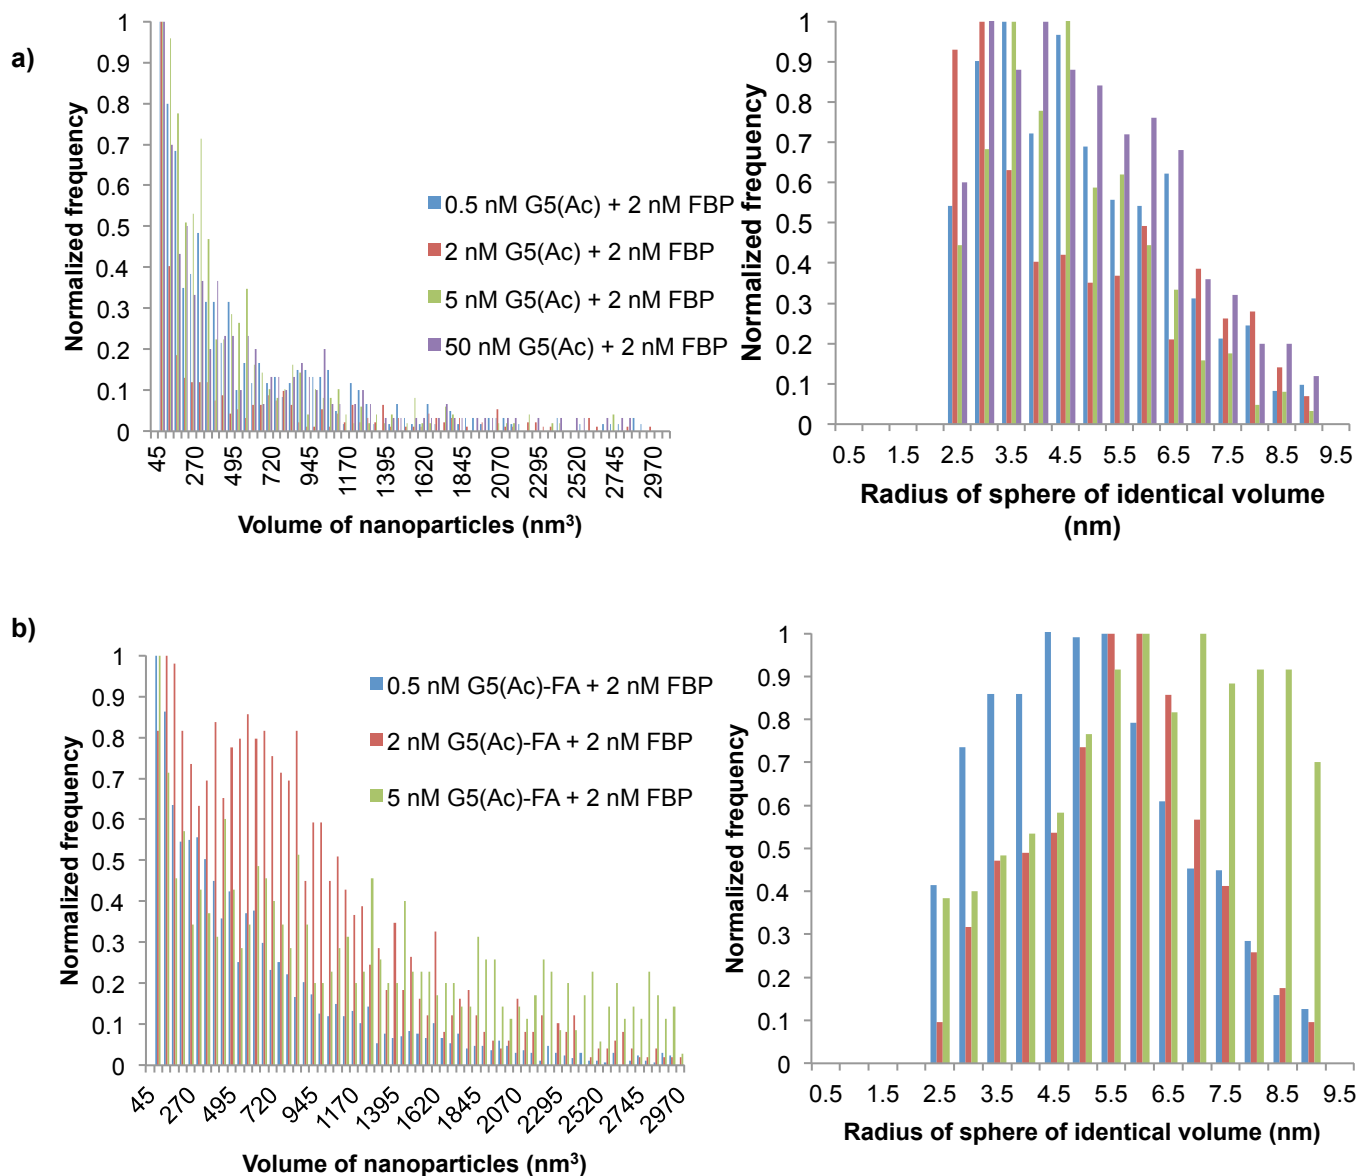

**Figure S2.** a) Histograms showing the volume (left) and extrapolated radii (right) distributions of FBP nanoparticles generated with G5<sub>Ac</sub>; b) Histograms showing the volume (left) and extrapolated radii (right) distributions of FBP nanoparticles generated with G5<sub>Ac</sub>-FA<sub>4(avg)</sub>.

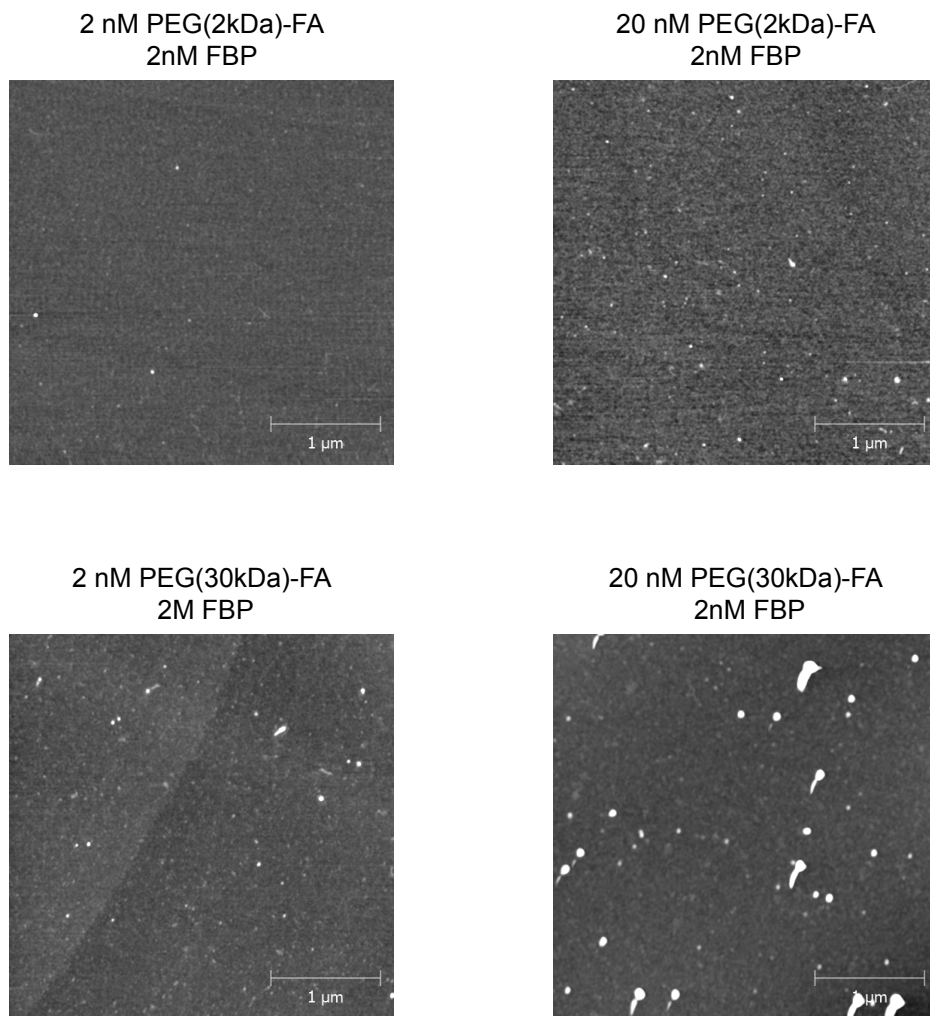

**Figure S3.** AFM images (3.5x3.5 μm) of mixtures of FBP + PEG-FA of varying polymer molecular weights at different concentrations. In all cases, PEG-FA was added to FBP (2 nM in 1x PBS). AFM images were captured by spin coating the solutions onto freshly-cleaved mica. The lack of nanoparticles indicates that PEG-FA disrupted already existing apo-FBPNP. Higher concentrations of PEG-FA were attempted, but multilayers of polymer were observed. This phenomenon is already evident in the PEG(30kDa)-FA samples.
